# Supplementary material for: Self-templated formation of (NiCo)9S8yolk–shelled spheres for high-performance hybrid supercapacitors
Source: Royal Society of Chemistry journal article supplement (doi:10.1039/d0nr06447e), 2020-01-01
Supplement: d0nr06447e1.pdf [file d0nr06447e1.pdf]

## Supporting Information

### Self-Templated Formation of (NiCo)<sub>9</sub>S<sub>8</sub> Yolk-Shelled Spheres for High Performance Hybrid Supercapacitors

Yi-Lin Liu<sup>a,b,1</sup>, Cheng Yan<sup>a,c,1</sup>, Gui-Gen Wang<sup>a,\*</sup>, Fei Li<sup>a</sup>, Yang Shang<sup>b</sup>, Hua-Yu  
Zhang<sup>a</sup>, Jie-Cai Han<sup>a,c</sup>, Hui Ying Yang<sup>b,\*</sup>

<sup>a</sup>*Shenzhen Key Laboratory for Advanced Materials,  
Harbin Institute of Technology, Shenzhen, Shenzhen 518055, P. R. China  
[wangguiugen@hit.edu.cn](mailto:wangguiugen@hit.edu.cn) (Gui-Gen Wang)*

<sup>b</sup>*Pillar of Engineering Product Development, Singapore University of Technology and  
Design, 8 Somapah Road, Singapore 487372, Singapore  
[yanghuiying@sutd.edu.sg](mailto:yanghuiying@sutd.edu.sg) (Hui Ying Yang)*

<sup>c</sup>*School of Chemistry, Faculty of Science, The University of Sydney, Sydney 2006,  
Australia*

<sup>d</sup>*National Key Laboratory of Science and Technology on Advanced Composites in  
Special Environments, Harbin Institute of Technology, Harbin 150080, China*

<sup>1</sup>Y.L.L. and C.Y. contributed equally to this work.

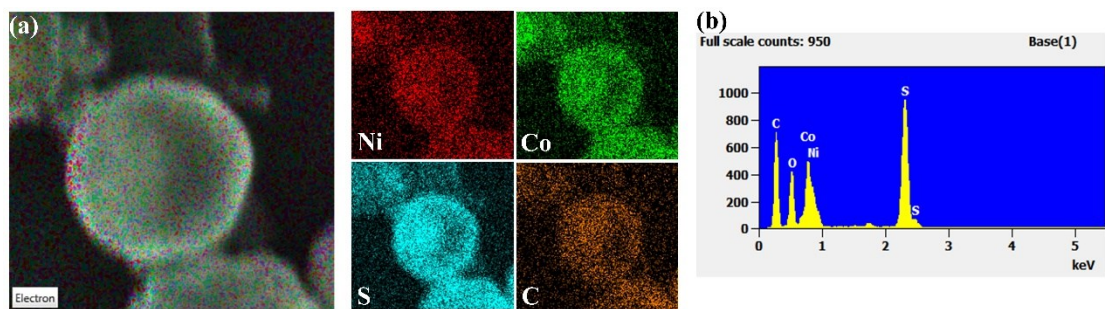

**Figure S1.** (NiCo)<sub>9</sub>S<sub>8</sub>/C-600 sphere (a) elemental mapping of Ni, Co S and C, (b) EDS.

Spectrum. respectively.

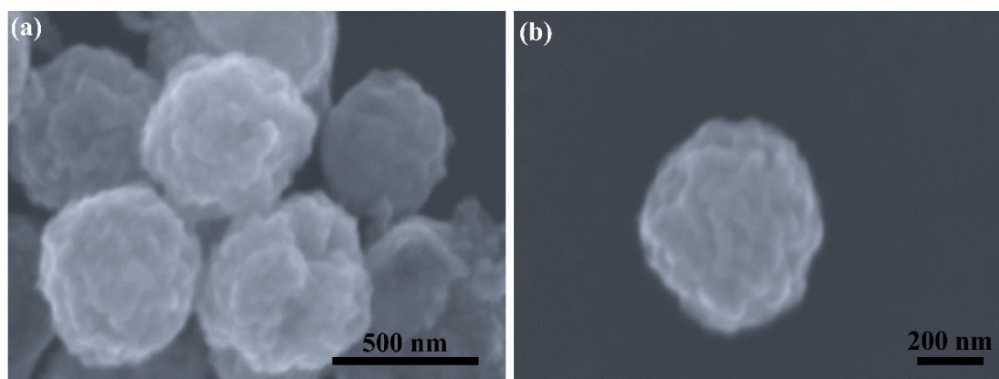

**Figure S2.** SEM images of (NiCo)<sub>9</sub>S<sub>8</sub>/GC-400: (a) Low magnification; (b) High magnification.

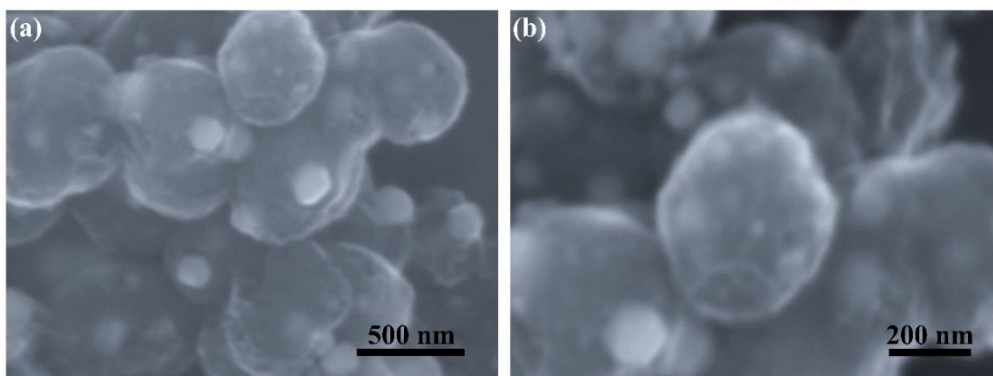

**Figure S3.** SEM images of (NiCo)<sub>9</sub>S<sub>8</sub>/GC-800: (a) Low magnification; (b) High magnification.

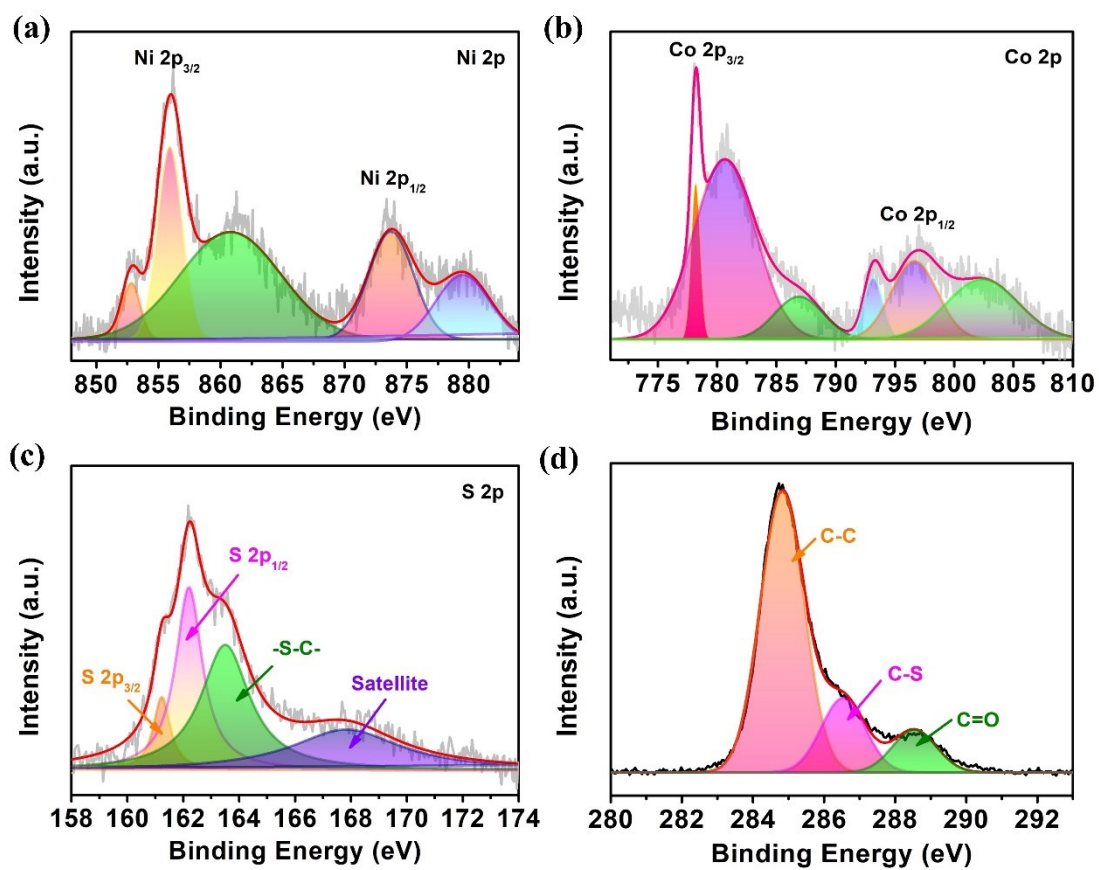

**Figure S4.** XPS spectra of the as-obtained  $(\text{NiCo})_9\text{S}_8/\text{GC-400}$  spheres: (a) Ni 2p; (b) Co 2p; (c) S 2p and (d) C 1s.

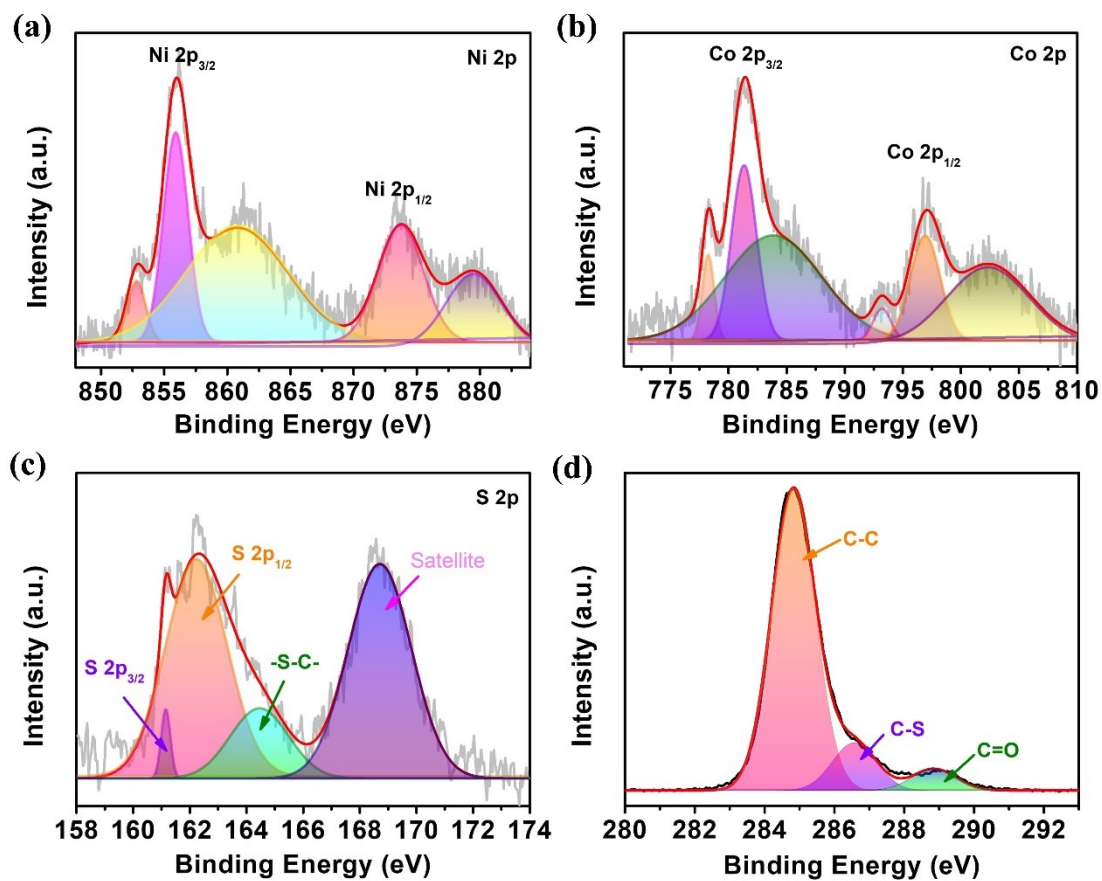

**Figure S5.** XPS spectra of the as-obtained  $(\text{NiCo})_9\text{S}_8/\text{GC}-800$  spheres: (a) Ni 2p; (b) Co 2p; (c) S 2p and (d) C 1s.

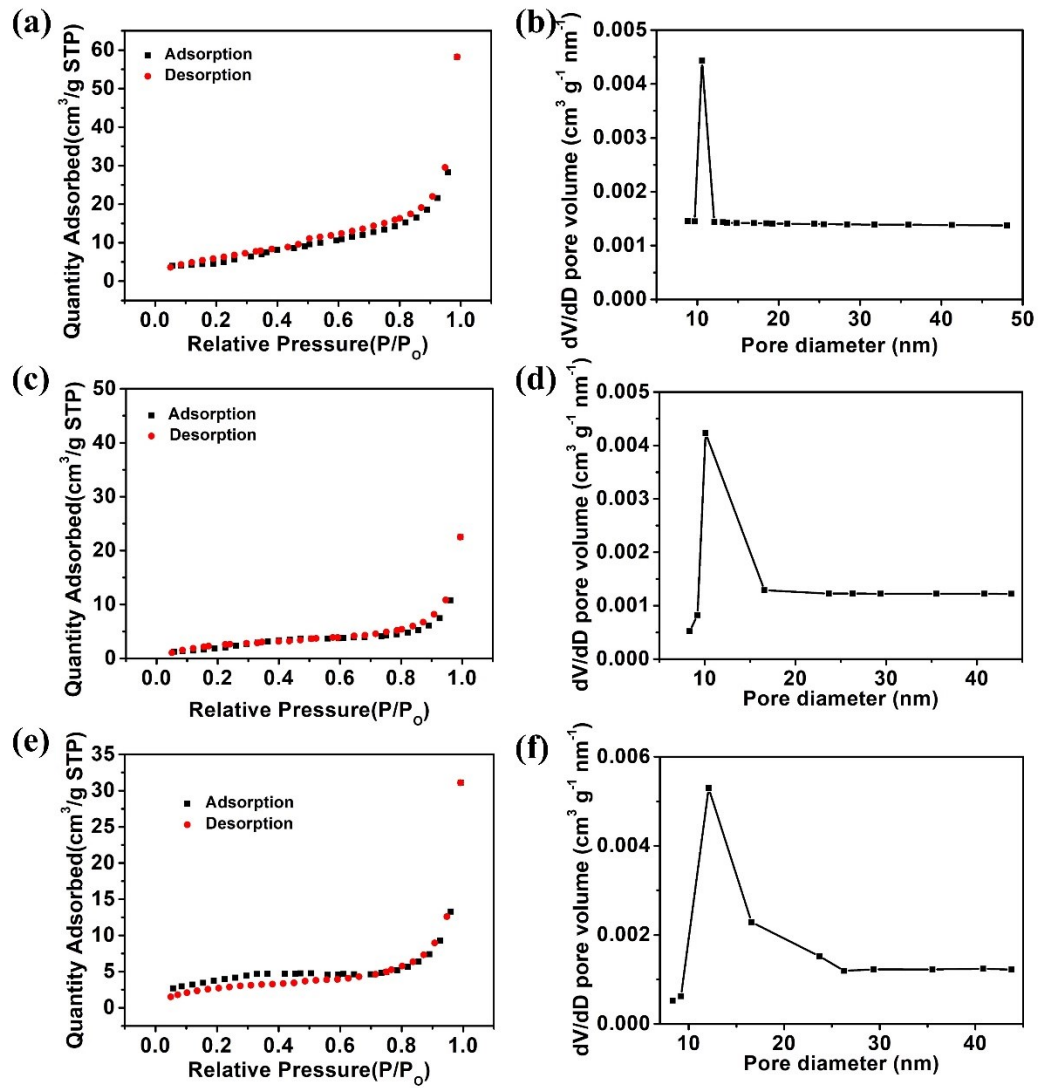

Figure S6. BET measurements: Nitrogen adsorption/desorption isotherms and the pore-size distribution. a-b)  $(\text{NiCo})_9\text{S}_8/\text{GC-400}$ ; c-d)  $(\text{NiCo})_9\text{S}_8/\text{GC-600}$ ; e-f)  $(\text{NiCo})_9\text{S}_8/\text{GC-800}$ .

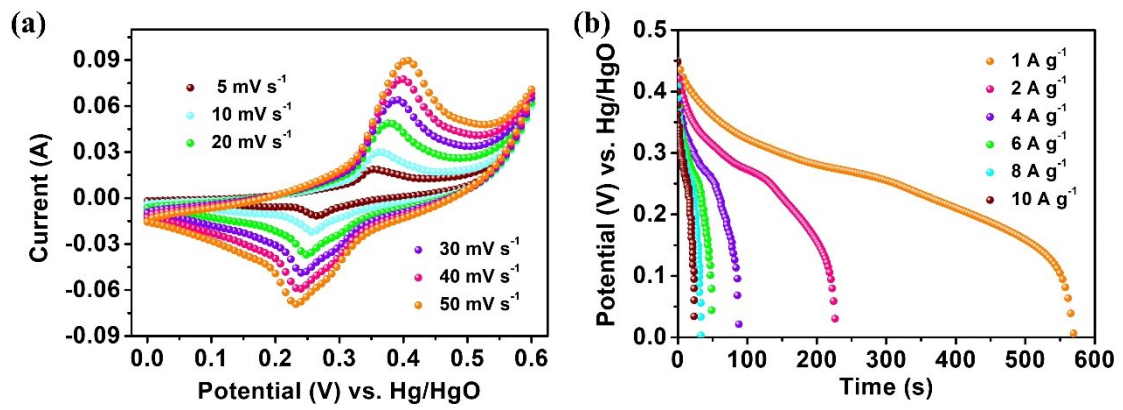

**Figure S7.** The electrochemical performance of the (NiCo)<sub>9</sub>S<sub>8</sub>/GC-400 spheres: (a) The CV curves; (b) The discharge curves.

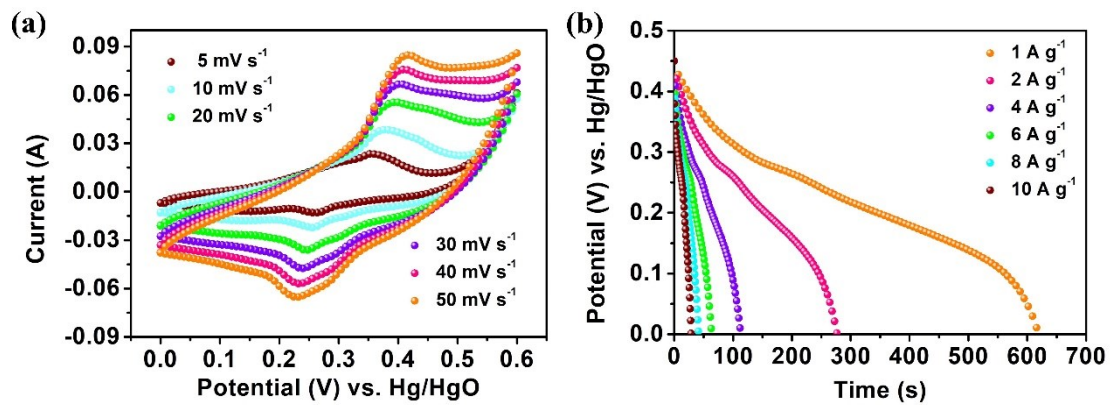

**Figure S8.** The electrochemical performance of the (NiCo)<sub>9</sub>S<sub>8</sub>/GC-800 spheres: (a) The CV curves; (b) The discharge curves.



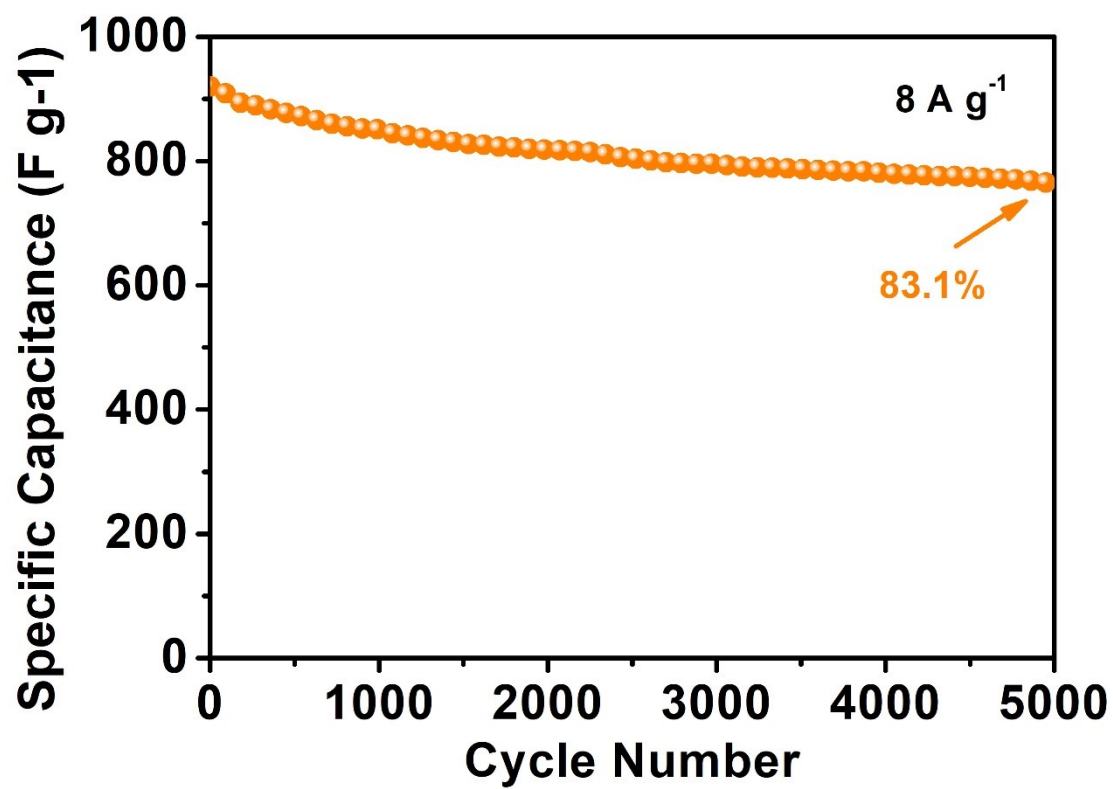

Figure S9. The cycling performance of the yolk-shelled (NiCo)<sub>9</sub>S<sub>8</sub>/GC-600 sphere.

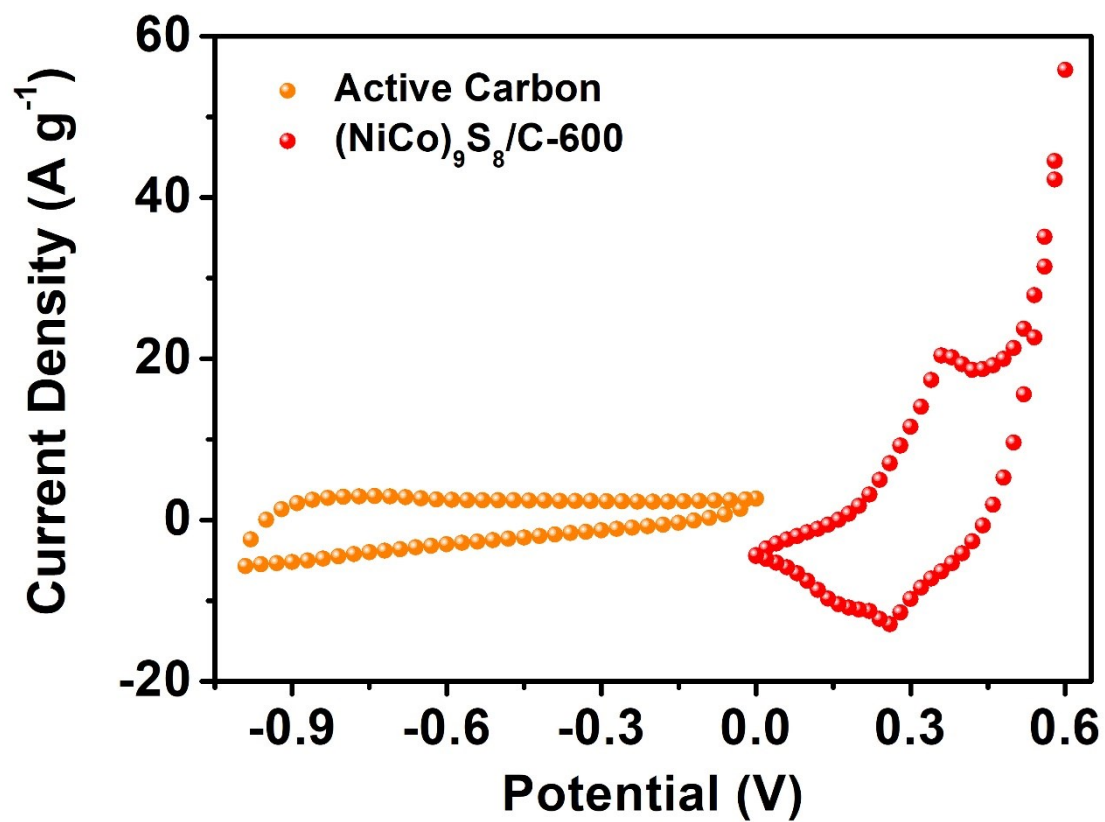

Figure S10. CV curves of AC and yolk-shelled (NiCo)<sub>9</sub>S<sub>8</sub>/GC-600 sphere at the scan rate of 5 mV s<sup>-1</sup>.

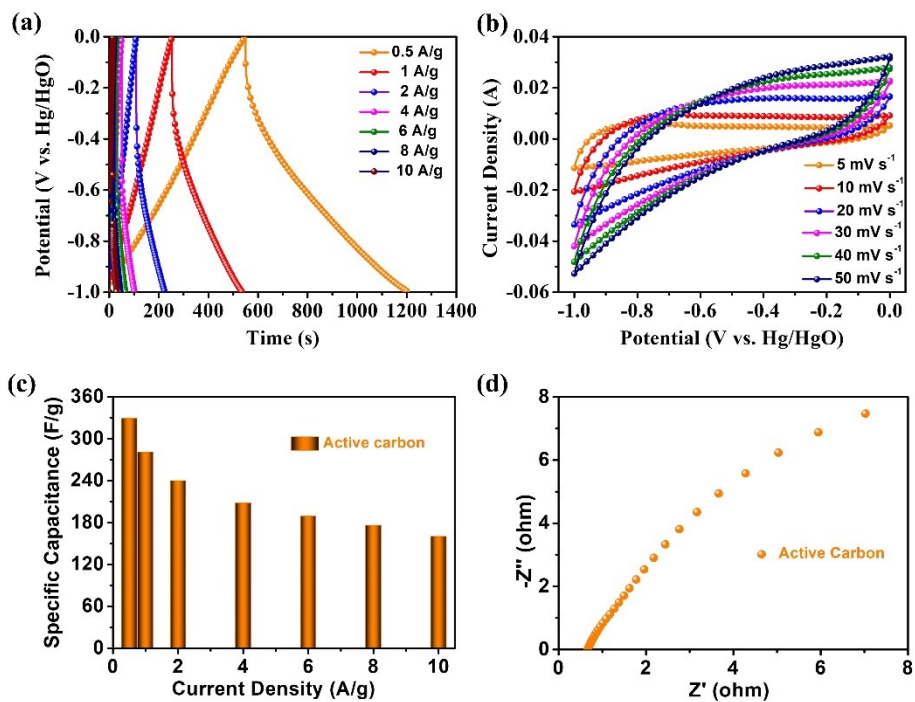

**Figure S11.** The electrochemical performance of AC: (a) The CV curves; (b) The GCD curves; (c) Rate performance; (d) EIS curves.

**Table S1.** Comparison of electrochemical performance between various hybrid pseudocapacitive electrodes and our work.

| Electrode composition                                                | Electrolyt | Specific capacitance                                   | Counter electrode           | Cyclic stability         | Ref.      |
|----------------------------------------------------------------------|------------|--------------------------------------------------------|-----------------------------|--------------------------|-----------|
| (NiCo) <sub>9</sub> S <sub>8</sub>                                   | 2M KOH     | 1434.4 F g <sup>-1</sup> at 1 A g <sup>-1</sup> /<br>e | Hg/HgO electrode            | 83.1 % after 5000 cycles | This work |
| NiCo <sub>2</sub> S <sub>4</sub> Nanoflakes[1]                       | 2M KOH     | 908.1 F g <sup>-1</sup> at 1 A g <sup>-1</sup>         | saturated calomel electrode | 87.7 % after 2000 cycles | S1        |
| Porous NiCo <sub>2</sub> S <sub>4</sub> [2]                          | 6M KOH     | 1268 F g <sup>-1</sup> at 1 A g <sup>-1</sup>          | Ag/AgCl electrode           | 82 % after 10000 cycles  | S2        |
| NiCo <sub>2</sub> S <sub>4</sub> Nanosheets[3]                       | 1M KOH     | 1394.5 F g <sup>-1</sup> at 1 A g <sup>-1</sup>        | Ag/AgCl electrode           | 124 % after 10000 cycles | S3        |
| NiCo <sub>2</sub> S <sub>4</sub> nanoparticles[4]                    | 6M KOH     | 1090 F g <sup>-1</sup> at 2 A g <sup>-1</sup>          | Hg/HgO electrode            | 80.1 % after 3000 cycles | S4        |
| NiCo <sub>2</sub> S <sub>4</sub> nanorod[5]                          | 1M KOH     | 1130 F g <sup>-1</sup> at 0.4 A g <sup>-1</sup>        | Hg/HgO electrode            | 80 % after 1000 cycles   | S5        |
| NiCo <sub>2</sub> S <sub>4</sub> nanotubes[6]                        | 1M KOH     | 1240 F g <sup>-1</sup> at 1 A g <sup>-1</sup>          | Hg/HgO electrode            | 80 % after 5000 cycles   | S6        |
| Co <sub>9</sub> S <sub>8</sub> /S-rGO[7]                             | 6M KOH     | 708.3 F g <sup>-1</sup> at 1 A g <sup>-1</sup>         | Hg/HgO electrode            | 71.2 % after 2000 cycles | S7        |
| Co <sub>9</sub> S <sub>8</sub> /GO[8]                                | 6M KOH     | 540 C g <sup>-1</sup> at 4 A g <sup>-1</sup>           | Hg/HgO electrode            | 93.9 % after 1000 cycles | S8        |
| CoNi <sub>2</sub> S <sub>4</sub> /Co <sub>9</sub> S <sub>8</sub> [9] | 3M KOH     | 1183.3 F g <sup>-1</sup> at 2 A g <sup>-1</sup>        | Ag/AgCl electrode           | 98.1 % after 1000 cycles | S9        |

Co<sub>9</sub>S<sub>8</sub>[10]

1M KOH

514 F g<sup>-1</sup> at 1 A g<sup>-1</sup>

Ag/AgCl electrode

88 % after 1000 cycles

S10

---

## References

- [1] Y. Zheng, J. Xu, X. Yang, Y. Zhang, Y. Shang, X. Hu, Decoration NiCo<sub>2</sub>S<sub>4</sub> nanoflakes onto ppy nanotubes as core-shell heterostructure material for high-performance asymmetric supercapacitor, *Chem. Eng. J.* 333 (2018) 111-121.
- [2] Q. Gao, X. Wang, Z. Shi, Z. Ye, W. Wang, N. Zhang, Z. Hong, M. Zhi, Synthesis of porous NiCo<sub>2</sub>S<sub>4</sub> aerogel for supercapacitor electrode and oxygen evolution reaction electrocatalyst, *Chem. Eng. J.* 331 (2018) 185-193.
- [3] Y. Liu, Z. Li, L. Yao, S. Chen, P. Zhang, L. Deng, Confined growth of NiCo<sub>2</sub>S<sub>4</sub> nanosheets on carbon flakes derived from eggplant with enhanced performance for asymmetric supercapacitors, *Chem. Eng. J.* 366 (2019) 550-559.
- [4] Y. Zheng, X. Wang, W. Zhao, X. Cao, J. Liu, Phytic acid-assisted synthesis of ultrafine NiCo<sub>2</sub>S<sub>4</sub> nanoparticles immobilized on reduced graphene oxide as high-performance electrode for hybrid supercapacitors, *Chem. Eng. J.* 333 (2018) 603-612.
- [5] B. Li, B. Luo, J. Zhao, Y. Pan, H. Zhou, Y. Xiao, S. Lei, B. Cheng, high electrical conductivity-induced enhancement effect of electrochemical performance in mesoporous NiCo<sub>2</sub>S<sub>4</sub> nanorod-based supercapacitor, *J. Energy Storage* 26 (2019) 100955.
- [6] Y. Chen, T. Liu, L. Zhang, J. Yu, NiCo<sub>2</sub>S<sub>4</sub> Nanotubes Anchored 3D nitrogen-doped graphene framework as electrode material with enhanced performance for asymmetric supercapacitors, *ACS Sustain. Chem. Eng.* 7 (2019) 11157-11165.
- [7] Y. Yang, F. Ma, J. Wang, J. Li, J. Cao, W. Han, H. Gu, Y. Zhang, Comparative analysis of Co<sub>9</sub>S<sub>8</sub>/S-doped rGO composites as high-performance electrodes via facile one-step anneal fabrication for supercapacitor application, *J. Alloy. Compd.* 815 (2020) 152448.
- [8] B. Xie, M. Yu, L. Lu, H. Feng, Y. Yang, Y. Chen, H. Cui, R. Xiao, J. Liu, Pseudocapacitive Co<sub>9</sub>S<sub>8</sub>/graphene electrode for high-rate hybrid supercapacitors, *Carbon* 141 (2019) 134-142.
- [9] F. Zhao, W. Huang, H. Zhang, D. Zhou, Facile synthesis of CoNi<sub>2</sub>S<sub>4</sub>/Co<sub>9</sub>S<sub>8</sub> composites as advanced electrode materials for supercapacitors, *Appl. Surf. Sci.* 426 (2017) 1206-1212.
- [10] T.-W. Lin, H.-C. Tsai, T.-Y. Chen, L.-D. Shao, Facile and controllable one-pot synthesis of hierarchical Co<sub>9</sub>S<sub>8</sub> hollow microspheres as high-performance electroactive materials for energy storage and conversion, *ChemElectroChem* 5 (2018) 137-143.
